# Supplementary material
Source: publisher site journal article supplement (https://www.spandidos-publications.com/1610/downloadSupplementary)
Supplement: Supplementary file 1 [file downloadSupplementary]

Data S1.

The XM709442 Sash1-hSASH1(Y551D) Cas9-KI Targeted Genomic Sequence hSASH1(Y551D)-CDS is shown in green; the polyA is shown in grey; the exon1 is shown in blue; the mutation site is shown in red.

```
19441 CTTTGT TTTCCA AGAAGC CTGACA GACAGG ACTGTA ATTCCA GGGGTT GTCACC ATACGG
19501 ACTCCT CTAAAA CTCGAA CTCAGC GAGCGG CTAAAA GATTAA CTTTCT GCAGTT TCAGTG
19561 GCGGAA GGCGCG GGTGAA TGGCGC GATTGG GGA CTT GTGCAG GGCCCC GGGCCC GTGGCG
19621 CGGTGG CGCTTT CAAAAG GCGATT TGTTGG CCAGGC TGAGGC TCATTT CCATGC AAAGCG
19681 CCTGAC ATCAGA GCACCT TTTGTT GCTAAA CGCTTT CTTGAG CCTGGA GGGGAG GGAGTC
19741 ATGTGG AGTTGG AAGAGC TCATTC TAAAGA GAGGGG TCCAGG ACTAAT TAGCCC GGGTCC
19801 ACAGGC GTCACT GTCCCC TGCCCA GCCCTG CACAAA CTCTCC AGTAGA GGCGAG TCGTGT
19861 GCCACC CGGAGC CGGTCC CCGAAG CAGGAC GCAGCA CCGGTG CGGTGT GGCTCT TGTCTC
19921 CCTGGT CTCGTG AACTCC CCGCCG CAGCCA GTGTTG TGGACT CTGCTC CAGCTA CCCTGT
19981 TGCTGC GCCCGG CCCGGC TAGGAA AAGTTT CTGGAG TTGTCA ATCGCG GTCGCC CGGGAT
20041 CGAGGT GCCAGT CCTGGC AGTGGT GCTCGT ACCCAG CGGAGC CTGGGG CATGCG ACGCGG
20101 GGGCGC GGCCCG GTGACG CCGCGG GCGGAG AACTTG CGCCCC GTCGGC CGACGC GCTGCT
20161 GCGAGC GGTGGG CAGCGC GGGGAC CCGGAC GCGGAC GCACGG GGACGC GGCCAT GGAGGA
20221 CGCGGG AGCAGC TGGCCC GGGGCC GGAGCC TGAGCC CGAGCC CGAGCC GGAGCC CGAGCC
20281 CGCGCC GGAGCC GGAACC GGAGCC CAAGCC GGGTGC TGGCAC ATCCGA GGC GTT CTCCCG
20341 ACTCTG GACCGA CGTGAT GGGTAT CCTGGA CGGTTC ACTGGG AAACAT CGATGA CCTGGC
20401 GCAGCA GTATGC AGATTA TTACAA CACCTG TTTCTC CGACGT GTGCGA GAGGAT GGAGGA
20461 GCTGCG GAAACG GCGGGT TTCCCA GGACCT GGAAGT GGAGAA ACCCGA TGCTAG CCCCAC
20521 GTCACT TCAGCT GCGGTC CCAGAT CGAAGA GTCGCT TGGCTT CTGTAG CGCCGT GTC AAC
20581 CCCAGA AGTGGA AAGAAA GAACCC TCTTCA TAAATC AACTC AGAAGA CAGCTC TGTAGG
20641 AAAAGG AGACTG GAAGAA GAAAAA TAAGTA TTTCTG GCAGAA CTTCCG AAAGAA CCAGAA
20701 AGGAAT AATGAG ACAGAC TTCAAA AGGAGA AGACGT TGGTTA TGTTGC CAGTGA AATAAC
20761 GATGAG CGATGA GGAGCG GATCA GCTAAT GATGAT GGTC AAAGAAA GATGAT CACAAT
20821 TGAGGA AGCACT TGCTAG GCTCAA GGAATA CGAGGC CCAGCA CCGGCA GTCGGC TGCCCT
20881 GGACCC TGCTGA CTGGCC AGATGG TTCTTA CCAAC GTTTGA TGGCTC ATCAAA CTGCAA
20941 TTCAAG AGAACA ATCGGA TGATGA GACTGA GGAGTC GGTGAA GTTTAA GAGGTT ACACAA
21001 GCTGGT AACTC CACTCG CAGAGT CAGAAA GAAACT AATTAG GGTGGA AGAAAT GAAAAA
21061 ACCCAG CACTGA AGGTGG GGAGGA GCACGT GTTGA GAATTC GCCGGT CCTGGA TGAACG
21121 GTCCGC CCTCTA CTCTGG CGTGCA CAAGAA GCCCCT TTTCTT TGATGG CTCTCC TGAGAA
21181 ACCTCC CGAAGA TGACTC AGACTC TCTCAC CACGTC TCCATC CTCCAG CAGCCT GGACAC
21241 CTGGGG GGCTGG CCGGAA GTTGGT CAAAAC CTT CAG CAAAGG AGAGAG CCGGGG CCTGAT
21301 TAAGCC CCCCAA GAAGAT GGGGAC ATTCTT CTCTA CCCAGA AGAAGA AAAGGC CCAGAA
21361 AGTGTC CCGCTC CTT CAC CGAGGG GGAGAT GAAGAA GGGTCT CCGGTC CCTAAG CCACGG
21421 GAGAAC CTGCAG TTTTGG AGGATT T GACTT GACGAA TCGCTC TCTGCA CGTTGG CAGTAA
21481 TAATTC TGACCC AATGGG TAAAGA AGGAGA CTTTGT GTACAA AGAAGT CATCAA ATCACC
21541 TACTGC CTCTCG CATCTC TCTTGG GAAAAA GGTGAA ATCAGT GAAAGA GACGAT GAGAAA
21601 GAGAAT GTCTAA AAAATA CAGCAG CTCTGT CTCTGA GCAGGA CTCGGG CCTTGA TGGAAT
21661 GCCTGG CTCCCC TCCGCC TTCACA GCCCGA CCCC GA ACCTT GGACAA GCCCAA GCTCAA
```

21721 GGCCGG GGGTTC TGTAGA AAGTCT TCGCAG TTCTCT CAGTGG GCAGAG CTCCAT GAGCGG  
21781 TCAAAC AGTGAG CACCAC TGATTC CTCAAC CAGCAA CCGGGA AAGCGT CAAGTC GGAAGA  
21841 TGGGGA TGACGA AGAGCC GCCTGA CCGAGG CCCGTT CTGCGG GCGTGC CAGGGT GCACAC  
21901 CGACTT CACCCC CAGTCC CTATGA CACAGA CTCACT CAAGCT CAAGAA AGGAGA TATCAT  
21961 CGATAT AATCAG CAAGCC ACCCAT GGGGAC CTGGAT GGGCCT GCTGAA CAACAA AGTCGG  
22021 CACGTT CAAGTT CATCTA CGTGGG CGTGCT CAGTGA AGACGA GGAGAA ACCCAA ACGCCC  
22081 CACCAG GAGGCG TCGGAA AGGACG ACCACC CCAGCC CAAGTC TGTGGA GGATCT CCTGGA  
22141 TCGGAT TAACCT AAAAGA GCACAT GCCCAC TTTCCT GTTCAA TGGATA TGAAGA TTTGGA  
22201 CACCTT TAAGCT GCTGGA GGAGGA AACTTT GGATGA GTTAAA TATCAG GGACCC GGAACA  
22261 CAGAGC TGTTCT CTTGAC AGCAGT GGAGCT GTTACA AGAGTA TGACAG TAACAG CGACCA  
22321 GTCAGG ATCCCA GGAGAA GCTGCT CGTTGA CAGCCA GGGCCT GAGTGG ATGCTC ACCCCC  
22381 AGACTC AGGATG CTACGA AAGCAG TGAGAA CCTGGA AAACGG CAAGAC TCGGAA AGCTAG  
22441 CCTCCT ATCTGC CAAGTC ATCCAC CGAGCC CAGCTT GAAGTC TTTTAG CAGAAA CCAGTT  
22501 GGGCAA TTACCC AACATT GCCTTT AATGAA ATCAGG GGATGC ACTGAA GCAGGG ACAGGA  
22561 GGAGGG CAGGCT GGGTGG TGGCCT TGCCCC AGACAC GTCCAA GAGCTG TGACCC ACCTGG  
22621 TGTGAC TGGTTT GAATAA AAACCG AAGAAG CCTCCC AGTTTC CATCTG CCGGAG CTGTGA  
22681 GACCCT GGAGGG CCCCCA GACTGT GGACAC TTGGCC CGATC CCATC CCTGGA TGACCT  
22741 TCAAGT GGAGCC TGGTGC TGAGCA AGACGT GCCTAC CGAGGT GACAGA ACCGCC CCCTCA  
22801 GATTGT ACCTGA AGTGCC ACAGAA GACGAC GCCTC TTCCAC GAAGGC CCAGCC CCTGGA  
22861 GCAAGA CTCTGC TGTCGA CAATGC ATTGCT ACTGAC CCAAAG CAAGAG ATTTTC TGAACC  
22921 TCAGAA ATTGAC AACTAA GAAACT GGAGGG CTCAAT CGCAGC CTCTGG TCGCGG CCTGTC  
22981 ACCCCC TCAGTG TTTGCC CAGAAA CTATGA TGCTCA GCCTCC TGGAGC TAAACA CGGTTT  
23041 AGCAAG GACGCC TCTGGA GGGCCA CAGAAA AGGACA CGAGTT TGAAGG AACACA CCATCC  
23101 CCTGGG CACCAA AGAAGG GGTAGA TGCTGA GCAGAG AATGCA GCCCAA AATTCC ATCACA  
23161 GCCTCC ACCTGT TCCTGC CAAAAA GAGCAG AGAACG CCTTGC TAACGG ACTCCA CCCTGT  
23221 TCCCAT GGGCCC CAGTGG GGCCCT CCCAG TCCCGA TGGGCC ATGCCT GCCAGT GAAAAG  
23281 GGGCAG CCCC GCAGCC CACCAG CCCTAG CGACTG TCCCC AGCACT GGCTCC CAGGCC  
23341 TCTCTC AGGGCA GGCGCC TGGCAG CCCACC AAGCAC AAGGCC GCCCCC CTGGCT CTCAGA  
23401 GCTCCC CGAGAA CACAAG CCTCCA GGAGCA CGGTGT GAAGCT GGGCCC GGCTTT GACCAG  
23461 GAAGGT TCCTG TGCCCG GGGAGT GGATCT AGAAAC GTCAC TGAAAA CAAGCT GCACGC  
23521 TGAAGG CATCGA TCTCAC GGAGGA GCCGTA TTCTGA TAAGCA TGGCCG CTGTGG GATTCC  
23581 TGAAGC CCTGGT GCAGAG ATACGC AGAGGA CTGGA TCAGCC CGAGCG GGACGT CGCCGC  
23641 CAACAT GGACCA GATCCG GGTGAA GCAGCT TCGGAA GCAGCA CCGCAT GGCGAT TCCAAG  
23701 TGGTGG ACTCAC GAAAAT CTGCCG AAAGCC CGTCTC TCCTGG GTGCAT TTCGTC TGTGTC  
23761 AGATTG GTCAT TTCCAT CGGTCT GCCCAT GTACGC CGGCAC CCTCTC CACCGC GGGCTT  
23821 CAGCAC ACTGAG CCAAGT GCCTTC TCTGTC TCACAC TTGCCT TCAGGA GGCCGG CATCAC  
23881 AGAGGA GAGACA CATAAG AAAGCT CCTATC TGCAGC CAGACT CTTCAA ACTGCC GCCAGG  
23941 CCCTGA GGCCAT GTAGAC TCCTCA GGTGCA GGCTGC CTATCA GAAGGT GGTGGC TGGTGT  
24001 GGCCAA TGCCCT GGCTCA CAAATA CCACTG AGATCT TTTTCC CTCTGC CAAAAA TTATGG  
24061 GGACAT CATGAA GCCCCT TGAGCA TCTGAC TTCTGG CTAATA AAGGAA ATTTAT TTTCAT  
24121 TGCAAT AGTGTG TTGGAA TTTTTT GTGTCT CTCACT CGGAAG GACATA TGGGAG GGCAAA  
24181 TCATTT AAAACA TCAGAA TGAGTA TTTGGT TTAGAG TTTGGC AACATA TGCCCA TATGCT  
24241 GGCTGC CATGAA CAAAGG TTGGCT ATAAAG AGGTCA TCAGTA TATGAA ACAGCC CCCTGC  
24301 TGTCCA TTCTT ATTCCA TAGAAA AGCCTT GACTTG AGGTTA GATTTT TTTTAT ATTTTG

24361 TTTTGT GTTATT TTTTTC TTAAAC ATCCCT AAAATT TTCCTT ACATGT TTTACT AGCCAG  
24421 ATTTTT CCTCCT CTCCTG ACTACT CCCAGT CATAGC TGTCCC TCTTCT CTTATG GAGATC  
24481 CCTCGA CCTGCA G ATGGA GGAGGA CGCCGG AGCTGC TAGCCC G GCGCC GGAGCC TGAGCC  
24541 GGAGGT GGATCC CGCCCG GGAGCT GGAGCC CGAGGC CGGTGT CTCCGA GTCAAT CTCCCG  
24601 CCTCTG GACCGA CGTGAT GGGCAT CCTGGT GAGCTA CCTGGG GAGGCA GCGGGG GGAAGC  
24661 GGGGCT CACCCC TCGCCC ACCTAT TGGTCA CCCTTC TTCTTT CCGCTG TATTCT CTATAT  
24721 AGGGGT TGAAAC TGTAAT TTAGAA AAACCA AACCAA ACCAAA CCAACC AAACAA AAAAAA  
24781 ACCCCT ACTTGT CGGGTC ACATCA GAGACA CCTCTT GAACAA TCGACT GTAATT AGGGAC  
24841 ACCTGC TTAGAA AAGTTG GCGTGG AAAAAG CCAGAA AGAGTA GATGTA AATACT ACTTGT  
24901 AAATAT TTGGCG AGTGG A CTCCTC ATGGCC TCTCGG TATTGA TGTTTA TCCGCA CAGGGC  
24961 TTGTCC TGTGCC CATGAG AGGAAA ACAACC GTTTCC TTGTGC AGAACT ACCACG GTGTTT  
25021 ACTTGC TCTGCC CTCAGC TCTTCT AGTTTG TAGAAT TACAGG ATATTT GTTTTA TATGTT  
25081 TGGCGC TGAGAA CAATAA GGCATA TATTGC TGAATC TGTGCT GATAAG GGGTTT TGAACT

—
